# Supplementary material for: Amyloid-β peptide 37, 38 and 40 individually and cooperatively inhibit amyloid-β 42 aggregation
Source: Royal Society of Chemistry journal article supplement (doi:10.1039/d1sc02990h), 2022-01-01
Supplement: d1sc02990h1.pdf [file d1sc02990h1.pdf]

## Supporting Information

### **Amyloid- $\beta$ peptide 37, 38 and 40 individually and cooperatively inhibit amyloid- $\beta$ 42 aggregation**

Gabriel A. Braun,<sup>a,b</sup> Alexander J. Dear,<sup>a,c,d,e</sup> Kalyani Sanagavarapu,<sup>a,f</sup> Henrik Zetterberg,<sup>g,h,i,j</sup> Sara Linse<sup>a</sup>

<sup>a</sup>Biochemistry and Structural Biology, Lund University, Lund, Sweden

<sup>b</sup>Current address: University of California, San Francisco, Program in Chemistry and Chemical Biology, San Francisco, CA, United States

<sup>c</sup>Department of Cell Biology, Harvard Medical School, Boston, MA, United States

<sup>d</sup>Paulson School of Engineering and Applied Science, Harvard University, Cambridge, MA, United States

<sup>e</sup>Department of Chemistry, University of Cambridge, Cambridge, UK

<sup>f</sup>Current address: Wren Therapeutics Sweden AB, Lund, Sweden

<sup>g</sup>Department of Psychiatry and Neurochemistry, Institute of Neuroscience and Physiology, the Sahlgrenska Academy at the University of Gothenburg, Mölndal, Sweden

<sup>h</sup>Clinical Neurochemistry Laboratory, Sahlgrenska University Hospital, Mölndal, Sweden

<sup>i</sup>Department of Neurodegenerative Disease, UCL Institute of Neurology, Queen Square, London, UK

<sup>j</sup>UK Dementia Research Institute at UCL, London, UK

|                  |                         | effector peptide                             |                                              |                                                         |                                                             |
|------------------|-------------------------|----------------------------------------------|----------------------------------------------|---------------------------------------------------------|-------------------------------------------------------------|
|                  |                         | A $\beta$ <sub>37</sub>                      | A $\beta$ <sub>38</sub>                      | A $\beta$ <sub>40</sub>                                 | A $\beta$ <sub>42</sub>                                     |
| affected peptide | A $\beta$ <sub>37</sub> |                                              | not studied                                  | moderate acceleration, co-aggregation                   | strong acceleration, independent aggregation                |
|                  | A $\beta$ <sub>38</sub> | not studied                                  |                                              | moderate acceleration, co-aggregation                   | strong acceleration, independent aggregation                |
|                  | A $\beta$ <sub>40</sub> | moderate inhibition, co-aggregation          | moderate inhibition, co-aggregation          |                                                         | moderate acceleration, independent aggregation <sup>1</sup> |
|                  | A $\beta$ <sub>42</sub> | moderate inhibition, independent aggregation | moderate inhibition, independent aggregation | negligible effect, independent aggregation <sup>1</sup> |                                                             |

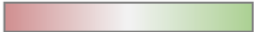
  
 strong inhibition      no effect      strong acceleration

**Table S1** Summary of results for unseeded binary mixtures. Each row shows the effect that different alloforms have on the aggregation of that peptide. Acceleration of aggregation is indicated by green, inhibition is indicated by red. Results for A $\beta$ <sub>40</sub>/A $\beta$ <sub>42</sub> mixture taken from [1].

|         |                         | seed peptide            |                         |                              |                              |
|---------|-------------------------|-------------------------|-------------------------|------------------------------|------------------------------|
|         |                         | A $\beta$ <sub>37</sub> | A $\beta$ <sub>38</sub> | A $\beta$ <sub>40</sub>      | A $\beta$ <sub>42</sub>      |
| monomer | A $\beta$ <sub>37</sub> | strong acceleration     | strong acceleration     | moderate acceleration        | moderate acceleration        |
|         | A $\beta$ <sub>38</sub> | strong acceleration     | strong acceleration     | moderate acceleration        | moderate acceleration        |
|         | A $\beta$ <sub>40</sub> | moderate acceleration   | moderate acceleration   | strong acceleration          | no acceleration <sup>1</sup> |
|         | A $\beta$ <sub>42</sub> | no acceleration         | no acceleration         | no acceleration <sup>1</sup> | strong acceleration          |

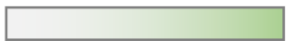
  
 no acceleration      moderate acceleration      strong acceleration

**Table S2** Summary of results for cross-seeding. Rows show the monomer, with columns showing the seed peptide. Acceleration of aggregation is indicated by green. Results for A $\beta$ <sub>40</sub>/A $\beta$ <sub>42</sub> cross-seeding taken from [1].

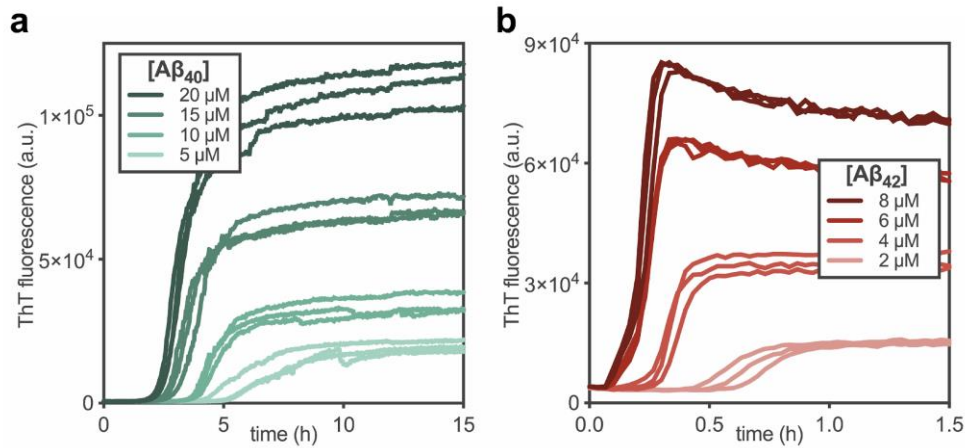

**Figure S1** Aggregation kinetics of (a) Aβ<sub>40</sub> and (b) Aβ<sub>42</sub> in 20 mM sodium phosphate buffer, pH 7.4, with 200 μM EDTA, 0.02% NaN<sub>3</sub>, and 20 μM ThT. The concentrations shown here are identical to those used for each peptide in binary mixtures with Aβ<sub>37</sub> and Aβ<sub>38</sub> (Figure 4 for Aβ<sub>40</sub> and Figure 6 for Aβ<sub>42</sub>).

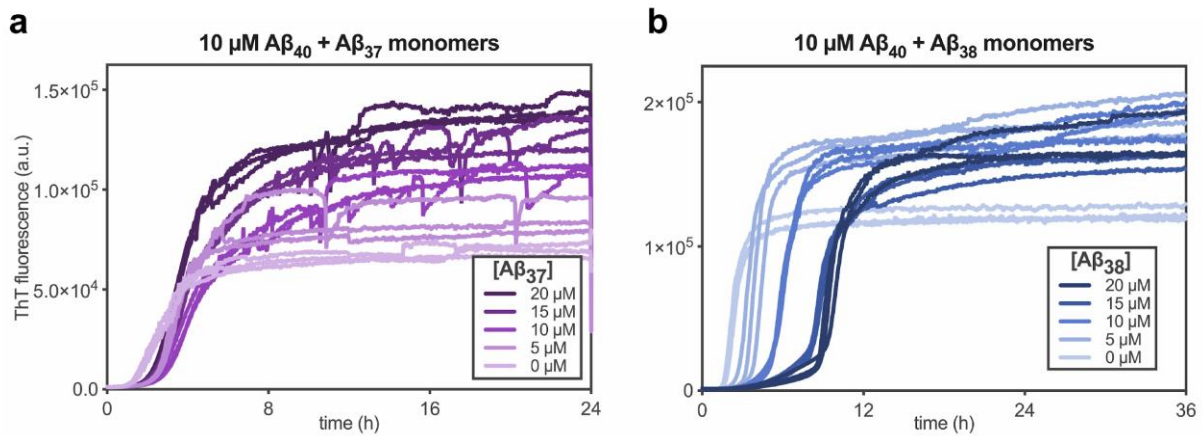

**Figure S2** Extended time-course for data shown in Figure 4a-b, showing the effect of Aβ<sub>40</sub> at varying concentrations on the aggregation of (a) Aβ<sub>37</sub> or (b) Aβ<sub>38</sub>. Experiments were performed in 20 mM sodium phosphate buffer, pH 7.4, with 200 μM EDTA, 0.02% NaN<sub>3</sub>, and 20 μM ThT.

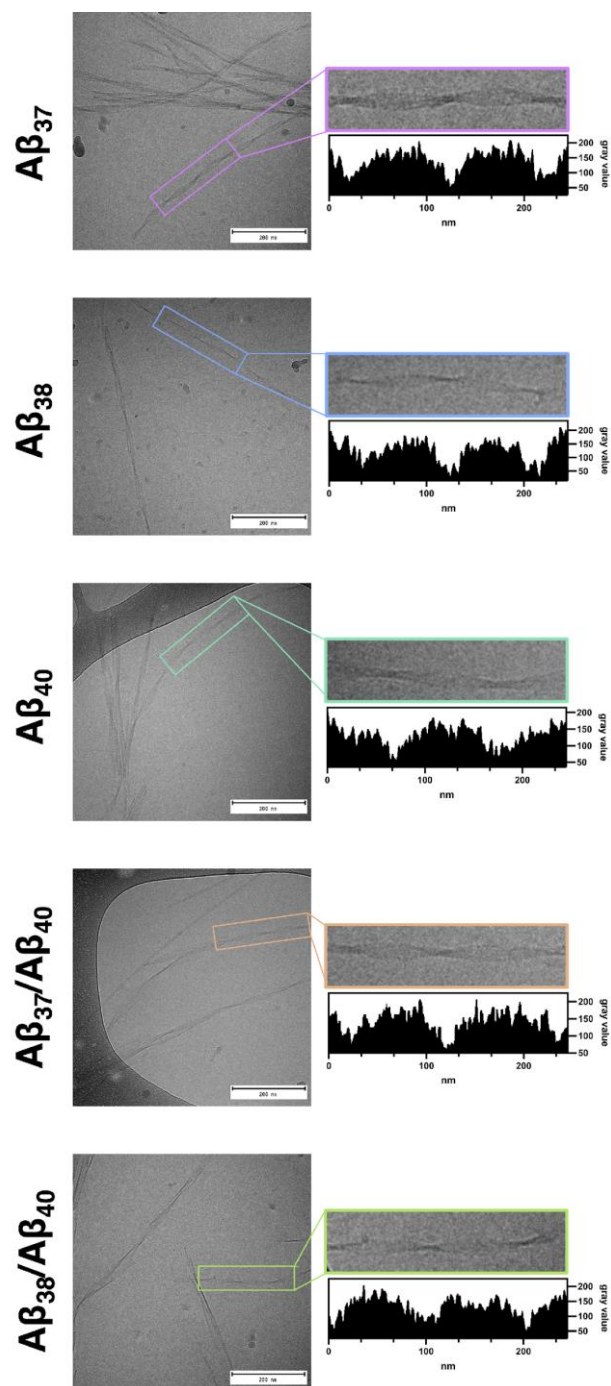

**Figure S3** Fibril grey scale profiles, used for the helical half-pitch period measurements shown in Figure 5b. A representative micrograph, fibril segment, and grey scale profile is shown for A $\beta$ <sub>37</sub>, A $\beta$ <sub>38</sub>, A $\beta$ <sub>40</sub>, and binary A $\beta$ <sub>37</sub>/A $\beta$ <sub>40</sub> and A $\beta$ <sub>38</sub>/A $\beta$ <sub>40</sub> mixtures. Grey scale profiles were generated using ImageJ.

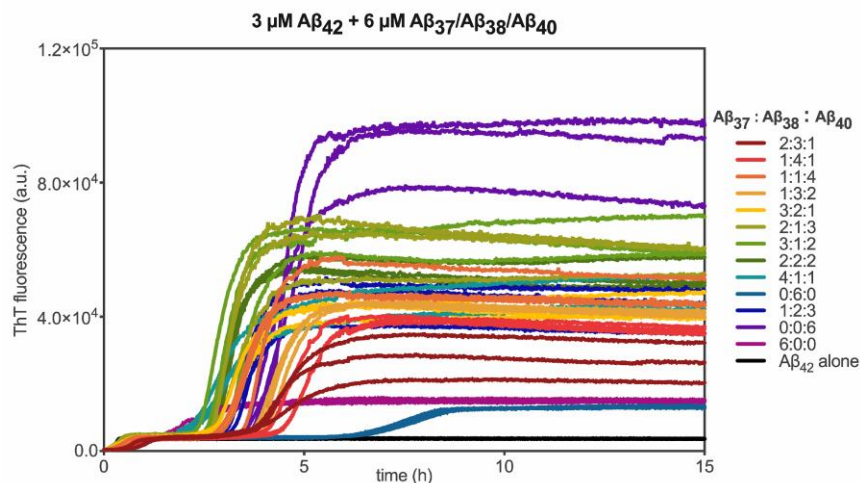

**Figure S4** Full aggregation profile for 3  $\mu\text{M}$   $\text{A}\beta_{42}$  with 6  $\mu\text{M}$  of  $\text{A}\beta_{37}/\text{A}\beta_{38}/\text{A}\beta_{40}$  mixtures in varying molar ratios (close-up of first fluorescence transition shown in Figure 11). The coloring of each sample corresponds to that in Figure 11. Experiments were performed in 20 mM sodium phosphate buffer, pH 7.4, with 200  $\mu\text{M}$  EDTA, 0.02% NaN<sub>3</sub>, and 20  $\mu\text{M}$  ThT.

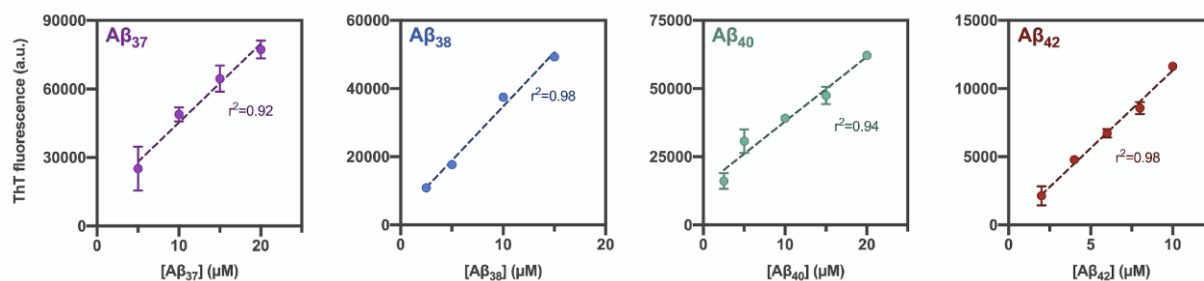

**Figure S5** ThT fluorescence scales linearly with aggregate concentration for each of  $\text{A}\beta_{37}$  (pink),  $\text{A}\beta_{38}$  (blue),  $\text{A}\beta_{40}$  (green), and  $\text{A}\beta_{42}$  (red). Readings were taken at the final fluorescence plateau for each sample; points represent the triplicate mean, with error bars showing standard deviation. Experiments were performed in 20 mM sodium phosphate buffer, pH 7.4, with 200  $\mu\text{M}$  EDTA, 0.02% NaN<sub>3</sub>, and 20  $\mu\text{M}$  ThT.

### Supporting References

- (1) Cukalevski, R.; Yang, X.; Meisl, G.; Weininger, U.; Bernfur, K.; Frohm, B.; Knowles, T. P. J.; Linse, S. The  $\text{A}\beta_{40}$  and  $\text{A}\beta_{42}$  Peptides Self-Assemble into Separate Homomolecular Fibrils in Binary Mixtures but Cross-React during Primary Nucleation. *Chem. Sci.* **2015**, 6 (7), 4215–4233. <https://doi.org/10.1039/C4SC02517B>.
